# Supplementary material for: Diagnostic performance of a Recombinant Polymerase Amplification Test—Lateral Flow (RPA-LF) for cutaneous leishmaniasis in an endemic setting of Colombia
Source: PLoS Negl Trop Dis. 2021 Apr 28;15(4):e0009291. doi: 10.1371/journal.pntd.0009291 (PMC8081229; doi:10.1371/journal.pntd.0009291)
Supplement: S1 Table — (CSV) [file pntd.0009291.s003.csv]

Id	Sex	Ethnicity	Age	Previous episode of leishmaniasis	Leishmania species	Number of lesions	Duration of the oldest lesion (months)	Department of origen
1	Male	Mestizo	76	No	L. (V.) panamensis	11	> 6	Valle del Cauca
2	Male	Mestizo	52	Yes	L. (V.) braziliensis	4	0-5.9	Nariño
3	Male	Afro-Colombian	22	No	N/A	1	0-5.9	Valle del Cauca
4	Male	Mestizo	50	Yes	N/A	1	> 6	Other
5	Male	Mestizo	56	No	N/A	1	0-5.9	Valle del Cauca
6	Male	Afro-Colombian	30	Yes	N/A	4	0-5.9	Other
7	Male	Mestizo	76	No	N/A	11	> 6	Valle del Cauca
8	Male	Afro-Colombian	43	No	N/A	1	> 6	Nariño
9	Female	Mestizo	35	No	N/A	1	> 6	Valle del Cauca
10	Male	Mestizo	53	No	N/A	1	0-5.9	Valle del Cauca
11	Male	Mestizo	57	No	N/A	1	0-5.9	Valle del Cauca
12	Male	Mestizo	33	No	N/A	1	0-5.9	Other
13	Female	Afro-Colombian	8	No	N/A	1	0-5.9	Nariño
14	Male	Afro-Colombian	72	No	N/A	1	> 6	Other
15	Female	Afro-Colombian	34	No	N/A	2	0-5.9	Nariño
16	Female	Afro-Colombian	11	No	N/A	2	0-5.9	Nariño
17	Male	Afro-Colombian	15	No	L. (V.) panamensis	2	0-5.9	Nariño
18	Female	Indigenous	7	No	L. (V.) panamensis	1	0-5.9	Nariño
19	Female	Indigenous	22	No	L. (V.) panamensis	2	0-5.9	Nariño
20	Male	Afro-Colombian	19	No	L. (V.) panamensis	3	0-5.9	Nariño
21	Female	Indigenous	24	No	L. (V.) panamensis	4	0-5.9	Nariño
22	Male	Afro-Colombian	9	No	L. (V.) panamensis	1	0-5.9	Nariño
23	Male	Afro-Colombian	22	No	N/A	2	0-5.9	Nariño
24	Male	Afro-Colombian	31	No	L. (V.) braziliensis	1	0-5.9	Nariño
25	Male	Mestizo	6	No	N/A	3	0-5.9	Nariño
26	Male	Indigenous	22	No	L. (V.) braziliensis	1	0-5.9	Nariño
27	Male	Mestizo	32	No	L. (V.) panamensis	2	0-5.9	Nariño
28	Male	Afro-Colombian	20	No	L. (V.) panamensis	11	0-5.9	Nariño
29	Female	Mestizo	39	No	N/A	1	0-5.9	Nariño
30	Male	Mulato	61	No	N/A	4	0-5.9	Nariño
31	Female	Afro-Colombian	40	No	N/A	1	0-5.9	Nariño
32	Female	Afro-Colombian	2	No	L. (V.) panamensis	2	0-5.9	Nariño
33	Female	Mestizo	43	No	L. (V.) panamensis	1	0-5.9	Nariño
34	Female	Afro-Colombian	24	No	L. (V.) panamensis	2	0-5.9	Nariño
35	Male	Afro-Colombian	9	No	L. (V.) panamensis	2	0-5.9	Nariño
36	Male	Afro-Colombian	12	No	L. (V.) panamensis	7	0-5.9	Nariño
37	Male	Mestizo	11	No	L. (V.) panamensis	3	0-5.9	Nariño
38	Male	Afro-Colombian	32	Yes	N/A	2	0-5.9	Nariño
39	Male	Indigenous	37	No	L. (V.) panamensis	1	0-5.9	Nariño
40	Male	Afro-Colombian	7	No	L. (V.) panamensis	1	0-5.9	Nariño
41	Male	Afro-Colombian	14	No	L. (V.) panamensis	2	0-5.9	Nariño
42	Male	Indigenous	15	No	L. (V.) panamensis	2	0-5.9	Nariño
43	Female	Afro-Colombian	47	No	N/A	2	> 6	Nariño
44	Male	Afro-Colombian	15	No	L. (V.) panamensis	5	0-5.9	Nariño
45	Female	Afro-Colombian	19	No	L. (V.) panamensis	1	0-5.9	Nariño
46	Male	Mestizo	47	No	L. (V.) panamensis	4	0-5.9	Nariño
47	Male	Afro-Colombian	13	No	L. (V.) panamensis	4	0-5.9	Nariño
48	Male	Afro-Colombian	18	No	L. (V.) panamensis	2	0-5.9	Nariño
49	Male	Indigenous	36	No	L. (V.) panamensis	2	0-5.9	Nariño
50	Male	Afro-Colombian	12	No	N/A	1	> 6	Nariño
51	Female	Mestizo	33	No	L. (V.) panamensis	1	0-5.9	Nariño
52	Male	Afro-Colombian	21	No	N/A	1	> 6	Nariño
53	Male	Afro-Colombian	25	No	L. (V.) panamensis	1	0-5.9	Nariño
54	Male	Afro-Colombian	17	No	N/A	3	0-5.9	Nariño
55	Male	Afro-Colombian	21	No	N/A	1	0-5.9	Nariño
56	Male	Indigenous	18	No	L. (V.) panamensis	1	0-5.9	Nariño
57	Male	Afro-Colombian	40	No	N/A	5	0-5.9	Nariño
58	Male	Afro-Colombian	13	No	L. (V.) panamensis	4	0-5.9	Nariño
59	Male	Afro-Colombian	28	No	L. (V.) panamensis	1	0-5.9	Nariño
60	Female	Afro-Colombian	22	No	L. (V.) panamensis	2	0-5.9	Nariño
61	Female	Afro-Colombian	52	No	L. (V.) panamensis	1	0-5.9	Nariño
62	Male	Afro-Colombian	13	No	L. (V.) panamensis	1	0-5.9	Nariño
63	Female	Afro-Colombian	22	No	L. (V.) panamensis	2	0-5.9	Nariño
64	Female	Afro-Colombian	24	No	N/A	1	0-5.9	Nariño
65	Female	Afro-Colombian	51	No	N/A	1	0-5.9	Nariño
66	Male	Mestizo	23	No	L. (V.) panamensis	1	0-5.9	Nariño
67	Male	Afro-Colombian	42	No	L. (V.) braziliensis	1	0-5.9	Nariño
68	Female	Afro-Colombian	5	No	L. (V.) panamensis	1	0-5.9	Nariño
69	Female	Afro-Colombian	27	No	N/A	1	0-5.9	Nariño
70	Male	Indigenous	20	No	L. (V.) panamensis	1	0-5.9	Nariño
71	Male	Indigenous	13	No	N/A	1	0-5.9	Nariño
72	Male	Mestizo	45	No	N/A	3	0-5.9	Nariño
73	Male	Mestizo	15	Yes	N/A	2	0-5.9	Nariño
74	Female	Afro-Colombian	51	No	L. (V.) panamensis	6	0-5.9	Nariño
75	Male	Mestizo	19	No	L. (V.) panamensis	1	0-5.9	Nariño
76	Male	Afro-Colombian	20	No	N/A	1	0-5.9	Nariño
77	Male	Afro-Colombian	55	No	L. (V.) panamensis	1	0-5.9	Nariño
78	Male	Caucasian	45	No	N/A	1	0-5.9	Nariño
79	Male	Mestizo	37	No	L. (V.) panamensis	1	0-5.9	Nariño
80	Male	Afro-Colombian	36	No	L. (V.) panamensis	5	0-5.9	Nariño
81	Male	Afro-Colombian	16	No	L. (V.) panamensis	3	0-5.9	Nariño
82	Male	Afro-Colombian	14	No	N/A	2	0-5.9	Nariño
83	Female	Afro-Colombian	47	No	L. (V.) panamensis	1	0-5.9	Nariño
84	Female	Mestizo	25	No	L. (V.) panamensis	1	0-5.9	Nariño
85	Male	Afro-Colombian	11	No	N/A	2	0-5.9	Nariño
86	Male	Afro-Colombian	22	No	N/A	3	0-5.9	Nariño
87	Female	Mestizo	19	No	L. (V.) panamensis	2	0-5.9	Nariño
88	Male	Mestizo	21	No	L. (V.) panamensis	6	0-5.9	Nariño
89	Male	Afro-Colombian	17	No	L. (V.) panamensis	1	0-5.9	Nariño
90	Male	Afro-Colombian	47	No	L. (V.) panamensis	3	0-5.9	Nariño
91	Male	Afro-Colombian	69	No	L. (V.) panamensis	1	> 6	Other
92	Male	Afro-Colombian	22	No	L. (V.) panamensis	1	0-5.9	Nariño
93	Male	Afro-Colombian	17	No	L. (V.) braziliensis	2	0-5.9	Nariño
94	Male	Mestizo	37	No	L. (V.) panamensis	3	0-5.9	Nariño
95	Male	Mestizo	26	No	L. (V.) panamensis	1	0-5.9	Nariño
96	Male	Afro-Colombian	16	No	N/A	1	0-5.9	Nariño
97	Male	Afro-Colombian	20	No	L. (V.) panamensis	6	0-5.9	Nariño
98	Male	Afro-Colombian	18	No	L. (V.) panamensis	5	0-5.9	Nariño
99	Male	Indigenous	23	No	L. (V.) panamensis	4	0-5.9	Nariño
100	Male	Indigenous	40	No	L. (V.) panamensis	1	0-5.9	Nariño
101	Female	Afro-Colombian	45	Yes	L. (V.) panamensis	1	0-5.9	Nariño
102	Male	Afro-Colombian	28	No	L. (V.) panamensis	3	0-5.9	Nariño
103	Male	Afro-Colombian	27	No	L. (V.) panamensis	1	0-5.9	Nariño
104	Female	Indigenous	41	No	N/A	1	0-5.9	Nariño
105	Male	Afro-Colombian	23	No	L. (V.) panamensis	2	0-5.9	Nariño
106	Female	Afro-Colombian	27	No	L. (V.) panamensis	1	0-5.9	Nariño
107	Male	Afro-Colombian	16	No	L. (V.) panamensis	1	0-5.9	Nariño
108	Female	Afro-Colombian	42	No	N/A	1	0-5.9	Nariño
109	Male	Indigenous	31	No	N/A	1	0-5.9	Nariño
110	Male	Afro-Colombian	69	No	N/A	1	0-5.9	Nariño
111	Female	Mestizo	53	No	L. (V.) panamensis	2	0-5.9	Nariño
112	Male	Afro-Colombian	24	No	N/A	1	0-5.9	Nariño
113	Female	Indigenous	84	No	N/A	1	0-5.9	Nariño
114	Female	Afro-Colombian	36	No	N/A	1	> 6	Nariño
115	Female	Afro-Colombian	48	No	N/A	1	0-5.9	Nariño
116	Male	Afro-Colombian	26	No	N/A	2	0-5.9	Nariño
117	Female	Afro-Colombian	33	No	N/A	1	0-5.9	Nariño
118	Male	Afro-Colombian	71	No	N/A	1	> 6	Nariño
