# Supplementary material for: Diagnostic performance of a Recombinant Polymerase Amplification Test—Lateral Flow (RPA-LF) for cutaneous leishmaniasis in an endemic setting of Colombia
Source: PLoS Negl Trop Dis. 2021 Apr 28;15(4):e0009291. doi: 10.1371/journal.pntd.0009291 (PMC8081229; doi:10.1371/journal.pntd.0009291)
Supplement: S2 Fig — (CSV) [file pntd.0009291.s002.csv]

Id	Smear	Culture	Biopsy	RPA-LF ref laboratory	q-PCR ref laboratory	RPA-LF in the field	q-PCR in the field	Composite goldstandard
1	Positive	Positive	No data available	Positive	Positive	Positive	Positive	Positive
2	Positive	Positive	No data available	Positive	Positive	Positive	Positive	Positive
3	Negative	Negative	No data available	Negative	Negative	Negative	Negative	Negative
4	Negative	Negative	Negative	Negative	Negative	Negative	Negative	Negative
5	Negative	Negative	No data available	Positive	Negative	Positive	Negative	Negative
6	Negative	Negative	No data available	Positive	Negative	Negative	Negative	Negative
7	Negative	Negative	Negative	Negative	Negative	Negative	Negative	Negative
8	Negative	Negative	Negative	Negative	Negative	Negative	Negative	Negative
9	Negative	Negative	Negative	Negative	Negative	Negative	Negative	Negative
10	Negative	Negative	No data available	Negative	Negative	Negative	Negative	Negative
11	Negative	Negative	Negative	Negative	Negative	Negative	Negative	Negative
12	Negative	Negative	No data available	Negative	Negative	Negative	Negative	Negative
13	Negative	Negative	Negative	Positive	Negative	Negative	Negative	Negative
14	Negative	Negative	Negative	Negative	Negative	Negative	Negative	Negative
15	Negative	Negative	No data available	Negative	Negative	Negative	Negative	Negative
16	Negative	Negative	No data available	Negative	Negative	Negative	Negative	Negative
17	Positive	Positive	No data available	Positive	Positive	Positive	Positive	Positive
18	Positive	Positive	No data available	Positive	Positive	Positive	Positive	Positive
19	Positive	Positive	No data available	Positive	Positive	Positive	Positive	Positive
20	Positive	Positive	No data available	Negative	Positive	Positive	Positive	Positive
21	Positive	Positive	No data available	Positive	Positive	Positive	Positive	Positive
22	Positive	Positive	No data available	Positive	Positive	Positive	Positive	Positive
23	Negative	Negative	No data available	Positive	Negative	Negative	Negative	Negative
24	Positive	Positive	No data available	Positive	Positive	Positive	Positive	Positive
25	Positive	Negative	No data available	Positive	Positive	Positive	Negative	Positive
26	Positive	Positive	No data available	Positive	Positive	Positive	Positive	Positive
27	Positive	Positive	No data available	Positive	Positive	Positive	Positive	Positive
28	Positive	Positive	No data available	Negative	Positive	Positive	Positive	Positive
29	Negative	Negative	No data available	Negative	Negative	Negative	Positive	Negative
30	Positive	Contaminated	No data available	Positive	Positive	Negative	Positive	Positive
31	Negative	Negative	Negative	Negative	Negative	Positive	Negative	Negative
32	Positive	Positive	No data available	Positive	Positive	Negative	Positive	Positive
33	Positive	Positive	No data available	Positive	Positive	Negative	Positive	Positive
34	Positive	Positive	No data available	Positive	Positive	Positive	Positive	Positive
35	Positive	Positive	No data available	Positive	Positive	Positive	Positive	Positive
36	Positive	Positive	No data available	Negative	Positive	Positive	Positive	Positive
37	Positive	Positive	No data available	Positive	Positive	Negative	Positive	Positive
38	Negative	Negative	Negative	Negative	Negative	Negative	Negative	Negative
39	Positive	Positive	No data available	Positive	Positive	Positive	Positive	Positive
40	Positive	Positive	No data available	Positive	Positive	Positive	Positive	Positive
41	Positive	Positive	No data available	Positive	Positive	Positive	Positive	Positive
42	Positive	Positive	No data available	Positive	Positive	Positive	Positive	Positive
43	Negative	Negative	Negative	Negative	Negative	Negative	Negative	Negative
44	Positive	Positive	No data available	Positive	Positive	Positive	Positive	Positive
45	Positive	Positive	No data available	Positive	Positive	Positive	Positive	Positive
46	Positive	Positive	No data available	Positive	Positive	Positive	Positive	Positive
47	Positive	Positive	No data available	Positive	Positive	Positive	Positive	Positive
48	Positive	Positive	No data available	Positive	Positive	Positive	Positive	Positive
49	Positive	Positive	No data available	Negative	Positive	Negative	Positive	Positive
50	Negative	Negative	No data available	Negative	Positive	Negative	Positive	Positive
51	Positive	Positive	No data available	Positive	Positive	Positive	Positive	Positive
52	Negative	Negative	No data available	Negative	Negative	Negative	Negative	Negative
53	Positive	Positive	No data available	Positive	Positive	Positive	Positive	Positive
54	Positive	Negative	No data available	Negative	Positive	Positive	Positive	Positive
55	Negative	Negative	No data available	Negative	Negative	Negative	Negative	Negative
56	Positive	Positive	No data available	Positive	Positive	Positive	Positive	Positive
57	Negative	Negative	Positive	Negative	Positive	Positive	Positive	Positive
58	Positive	Positive	No data available	Positive	Positive	Positive	Positive	Positive
59	Positive	Positive	No data available	Positive	Positive	Negative	Positive	Positive
60	Positive	Positive	No data available	Positive	Positive	Positive	Positive	Positive
61	Positive	Positive	No data available	Positive	Positive	Negative	Positive	Positive
62	Positive	Positive	No data available	Positive	Positive	Positive	Positive	Positive
63	Positive	Positive	No data available	Positive	Positive	Negative	Positive	Positive
64	Negative	Negative	No data available	Negative	Positive	Negative	Positive	Positive
65	Negative	Negative	No data available	Positive	Negative	Negative	Positive	Negative
66	Positive	Positive	No data available	Positive	Positive	Positive	Positive	Positive
67	Positive	Positive	No data available	Positive	Positive	Negative	Positive	Positive
68	Positive	Positive	No data available	Positive	Positive	Positive	Positive	Positive
69	Positive	Negative	No data available	Negative	Positive	Positive	Negative	Positive
70	Positive	Positive	No data available	Positive	Positive	Negative	Positive	Positive
71	Negative	Negative	No data available	Negative	Negative	Negative	Negative	Negative
72	Negative	Contaminated	No data available	Negative	Negative	Negative	Negative	Negative
73	Negative	Negative	No data available	Negative	Negative	Negative	Negative	Negative
74	Positive	Positive	No data available	Positive	Positive	Positive	Positive	Positive
75	Positive	Positive	No data available	Positive	Negative	Positive	Positive	Positive
76	Positive	Negative	No data available	Positive	Negative	Positive	Negative	Positive
77	Positive	Positive	No data available	Positive	Negative	Positive	Positive	Positive
78	Negative	Negative	No data available	Negative	Negative	Positive	Negative	Negative
79	Positive	Positive	No data available	Positive	Positive	Positive	Positive	Positive
80	Positive	Positive	No data available	Positive	Positive	Positive	Positive	Positive
81	Positive	Positive	No data available	Positive	Positive	Negative	Positive	Positive
82	Positive	Negative	No data available	Positive	Positive	Negative	Positive	Positive
83	Positive	Positive	No data available	Positive	Positive	Positive	Negative	Positive
84	Positive	Positive	No data available	Positive	Positive	Positive	Positive	Positive
85	Positive	Negative	No data available	Positive	Positive	Negative	Negative	Positive
86	Negative	Negative	No data available	Negative	Negative	Negative	Negative	Negative
87	Positive	Positive	No data available	Positive	Negative	Negative	Positive	Positive
88	Positive	Positive	No data available	Positive	Positive	Positive	Positive	Positive
89	Positive	Positive	No data available	Positive	Positive	Positive	Positive	Positive
90	Positive	Positive	No data available	Positive	Positive	Positive	Positive	Positive
91	Positive	Positive	No data available	Positive	Negative	Positive	Positive	Positive
92	Positive	Positive	No data available	Positive	Positive	Positive	Positive	Positive
93	Positive	Positive	No data available	Positive	Negative	Positive	Positive	Positive
94	Positive	Positive	No data available	Positive	Positive	Positive	Positive	Positive
95	Positive	Positive	No data available	Positive	Positive	Negative	Positive	Positive
96	Negative	Negative	No data available	Negative	Negative	Positive	Negative	Negative
97	Positive	Positive	No data available	Positive	Positive	Positive	Positive	Positive
98	Positive	Positive	No data available	Positive	Negative	Positive	Positive	Positive
99	Positive	Positive	No data available	Positive	Positive	Negative	Positive	Positive
100	Positive	Positive	No data available	Positive	Positive	Positive	Positive	Positive
101	Positive	Positive	No data available	Positive	Negative	Negative	Negative	Positive
102	Positive	Positive	No data available	Positive	Positive	Positive	Positive	Positive
103	Positive	Positive	No data available	Positive	Positive	Negative	Positive	Positive
104	Positive	Negative	No data available	Positive	Positive	Positive	Negative	Positive
105	Positive	Positive	No data available	Positive	Positive	Positive	Positive	Positive
106	Positive	Positive	No data available	Positive	Positive	Positive	Positive	Positive
107	Positive	Positive	No data available	Positive	Positive	Positive	Positive	Positive
108	Positive	Negative	No data available	Negative	Positive	Positive	Positive	Positive
109	Positive	Negative	No data available	Positive	Positive	Positive	Positive	Positive
110	Negative	Negative	Negative	Negative	Negative	Negative	Negative	Negative
111	Positive	Positive	No data available	Positive	Negative	Positive	Positive	Positive
112	Negative	Negative	No data available	Negative	Positive	Negative	Positive	Positive
113	Negative	Negative	Negative	Negative	Negative	Negative	Negative	Negative
114	Negative	Negative	Negative	Negative	Negative	Negative	Negative	Negative
115	Negative	Negative	Negative	Negative	Negative	Negative	Negative	Negative
116	Negative	Negative	Negative	Negative	Negative	Negative	Negative	Negative
117	Negative	Negative	Negative	Negative	Negative	Negative	Negative	Negative
118	Negative	Negative	Negative	Negative	Negative	Negative	Negative	Negative
