# Supplementary material for: Diagnostic performance of a Recombinant Polymerase Amplification Test—Lateral Flow (RPA-LF) for cutaneous leishmaniasis in an endemic setting of Colombia
Source: PLoS Negl Trop Dis. 2021 Apr 28;15(4):e0009291. doi: 10.1371/journal.pntd.0009291 (PMC8081229; doi:10.1371/journal.pntd.0009291)
Supplement: S2 Table — (CSV) [file pntd.0009291.s004.csv]

Id	Type of lesion	Location	Satellite lesions	Lymphadenopathy	Maximum diameter of lesions (mm)	Maximum diameter of ulcers (mm).
1	Plaque	Arms	No	No	13.1
1	Plaque	Arms	No	No	9.5
1	Ulcer	Legs	Yes	Yes	18.1	12.4
1	Plaque	Legs	No	Yes	12.8
1	Ulcer	Legs	Yes	Yes	55.5	46.6
1	Ulcer	Legs	Yes	Yes	24	13.3
1	Ulcer	Legs	No	Yes	28.7	25
1	Ulcer	Legs	No	Yes	39.8	16.9
2	Plaque	Arms	Yes	No	12
2	Ulcer	Arms	Yes	No	24.6	6.8
2	Ulcer	Arms	Yes	No	19.5	8.5
2	Other	Arms	No	No	17	3
3	Ulcer	Legs	No	No	56.7	10.1
4	Ulcer	Legs	No	No	55.5	40.8
5	Ulcer	Legs	No	No	24.5	11
6	Plaque	Arms	Yes	No	12.2
6	Plaque	Arms	Yes	No	32.5
6	Plaque	Legs	Yes	No	63.4
6	Ulcer	Legs	Yes	No	50.7	50.7
7	Ulcer	Legs	No	No	47.5	45
7	Ulcer	Legs	No	No		61.9
7	Ulcer	Legs	No	No		99.1
7	Ulcer	Legs	No	No	73.2	71
7	Ulcer	Legs	No	No	78.4	75
7	Ulcer	Legs	No	No	35.1	34
7	Ulcer	Legs	No	No		57.8
7	Ulcer	Legs	No	No	48.4	47
8	Ulcer	Arms	No	No		80.6
9	Ulcer	Legs	No	No	67
10	Ulcer	Arms	No	No	11	11
11	Ulcer	Trunk	No	No	15	14
12	Ulcer	Legs	No	No	23	14.5
13	Ulcer	Legs	No	No	20.27	13.4
14	Ulcer	Face-neck	No	No		80
15	Ulcer	Legs	No	No	13.1	9.3
15	Ulcer	Legs	No	No	6.8	4.2
16	Ulcer	Face-neck	No	No	20.9	15.8
16	Ulcer	Face-neck	No	No	20.2	20.6
17	Ulcer	Arms	No	No	24.5	20.3
17	Ulcer	Arms	No	No	25.1	19.6
18	Ulcer	Face-neck	No	No	14	10.2
19	Ulcer	Trunk	No	No	22.2	16
19	Ulcer	Legs	No	No	16.8	9.6
20	Ulcer	Face-neck	Yes	Yes	21.6	17
20	Ulcer	Arms	Yes	Yes	28	21.7
20	Ulcer	Arms	Yes	No	32.5	27.1
21	Ulcer	Trunk	No	No	7.3	4.8
21	Ulcer	Trunk	Yes	No	32.1	15.7
21	Ulcer	Trunk	Yes	No	24.1	14.9
21	Ulcer	Trunk	Yes	No	22.6	15.4
22	Ulcer	Arms	No	No	32	26
23	Ulcer	Legs	No	No	4
23	Ulcer	Legs	No	No	15.8	9.7
24	Ulcer	Arms	No	No	34.6	35.5
25	Other	Face-neck	No	No	4.6
25	Ulcer	Arms	No	No	12.6	8.1
25	Ulcer	Legs	No	No	41.8	39.2
26	Ulcer	Trunk	No	Yes	36	27.2
27	Ulcer	Arms	Yes	No	6.5	4.3
27	Ulcer	Arms	No	No	42	37
28	Ulcer	Arms	No	No	12	8
28	Ulcer	Arms	No	No		3.7
28	Ulcer	Legs	No	No	27.7	21.6
28	Ulcer	Legs	No	No	17.8	10.7
28	Ulcer	Legs	No	No	14	8.9
28	Ulcer	Legs	No	No	21	15
28	Ulcer	Legs	No	No	10.7	6.9
28	Ulcer	Legs	No	No	34.1	21.1
29	Ulcer	Legs	No	No	23	16
30	Ulcer	Trunk	No	No	7.6	4.3
30	Ulcer	Trunk	No	No	6	9.3
30	Ulcer	Legs	No	No	22	13
30	Ulcer	Legs	No	No	14	8
31	Ulcer	Face-neck	No	No	39.2	35
32	Ulcer	Arms	No	No	10.5	7.8
32	Ulcer	Legs	No	No	25.8	16.8
33	Ulcer	Arms	No	No	17.8	13.1
34	Ulcer	Arms	No	No	18.3	14.4
34	Ulcer	Arms	No	No	21.8	17.7
35	Ulcer	Arms	Yes	No	18.9	16.4
35	Ulcer	Arms	Yes	No	15.6	13.5
36	Ulcer	Face-neck	No	No	8.2	6.1
36	Ulcer	Face-neck	No	No	6.6	4.7
36	Ulcer	Face-neck	No	No	10.3	7.2
36	Ulcer	Arms	No	No	3.4	2
36	Ulcer	Arms	No	No	3.9	2.6
36	Ulcer	Arms	No	No	4.7	3.5
36	Ulcer	Arms	No	No	12.8	9.4
37	Ulcer	Trunk	No	No	41.3	38.2
37	Other	Trunk	No	No	3.2
37	Ulcer	Trunk	No	No	7.7	5.4
38	Ulcer	Legs	No	No	19.5	15.8
38	Ulcer	Legs	No	No	11.9	9
39	Ulcer	Arms	No	No	43.9	36.3
40	Ulcer	Face-neck	No	No	13	7.5
41	Ulcer	Arms	No	No	21.6	18.8
41	Ulcer	Arms	No	No	15.4	11.9
42	Ulcer	Legs	No	Yes	16.4	18.3
42	Ulcer	Legs	No	No	12	8.6
43	Ulcer	Legs	No	No	45.1	34
43	Ulcer	Legs	No	No	44.6	39
44	Ulcer	Arms	Yes	No	17.4	14.9
44	Ulcer	Legs	No	No	21	16.3
44	Ulcer	Legs	No	No	30.9	27
44	Ulcer	Legs	No	No	31	24
44	Ulcer	Legs	No	No	13.9	7.9
45	Ulcer	Legs	Yes	No	22.4	18
46	Ulcer	Arms	No	No	16.6	12.8
46	Ulcer	Arms	No	No	7.9	5.9
46	Ulcer	Arms	No	No	16.9	13.2
46	Ulcer	Legs	No	No	22.9	15.4
47	Plaque	Trunk	No	No	9.2
47	Ulcer	Arms	No	No	34.5	29.6
47	Ulcer	Legs	No	No	19.1	16.9
47	Ulcer	Legs	No	No	12.4	10.3
48	Ulcer	Arms	No	No	16.5	13.7
48	Ulcer	Arms	No	No	24.3	19.2
49	Ulcer	Trunk	No	No	13.6	10.6
49	Ulcer	Trunk	Yes	No	26.5	23.4
50	Ulcer	Arms	No	No	17.1	14.7
51	Ulcer	Arms	No	No	15.2	11.9
52	Ulcer	Arms	No	No	15	12
53	Ulcer	Arms	No	No	24.7	21.9
54	Ulcer	Face-neck	Yes	Yes	22.6	18.5
54	Ulcer	Face-neck	Yes	Yes	11.8	8.5
54	Ulcer	Arms	No	No	23.5	20
55	Ulcer	Legs	No	No	20.6	18.6
56	Ulcer	Legs	No	No	15.4	11.9
57	Ulcer	Arms	No	No	23.3	20
57	Ulcer	Arms	No	No	10.2	7.8
57	Ulcer	Arms	No	No	21.3	14.4
57	Ulcer	Arms	No	No	7.5	5.3
57	Ulcer	Arms	No	No	7.9	5.5
58	Ulcer	Arms	No	No	13	10.6
58	Ulcer	Arms	No	No	20	16
58	Ulcer	Arms	No	No	13.9	11
58	Ulcer	Arms	No	No	15.1	10.1
59	Ulcer	Legs	No	No	38	33.2
60	Ulcer	Legs	No	No	14.7	8.3
60	Ulcer	Legs	No	No	12.5	8.5
61	Ulcer	Legs	No	No	21.4	16.4
62	Ulcer	Face-neck	No	No	17.1	13
63	Ulcer	Arms	No	No	12.2	7.1
63	Ulcer	Arms	No	No	23	16
64	Ulcer	Legs	No	No	45.9
65	Ulcer	Trunk	No	No	33.3	30.9
66	Ulcer	Face-neck	Yes	No	15.6	9.3
67	Ulcer	Arms	No	No	29.1	21.5
68	Ulcer	Arms	No	No	12.3	8.4
69	Ulcer	Legs	No	No	22.8	23
70	Ulcer	Arms	No	No	21.6	16.8
71	Ulcer	Legs	No	No	13.3	10.7
72	Ulcer	Legs	No	No	6.1
72	Ulcer	Legs	No	No	11.1	7.1
72	Ulcer	Legs	No	No	27.7	18.6
73	Ulcer	Arms	No	No	22.9	15
73	Ulcer	Arms	No	No	21.9	14
74	Ulcer	Arms	No	No	6.36	5.23
74	Ulcer	Arms	No	No	3.21	2.67
74	Ulcer	Arms	No	No	12.96	35.19
74	Ulcer	Face-neck	No	No	13.48	12.57
74	Ulcer	Arms	No	No	4.05	3.12
74	Ulcer	Legs	No	No	6.23	8.32
75	Ulcer	Trunk	No	No	14.5	0.9
76	Ulcer	Arms	No	No	4.3	4
77	Ulcer	Arms	No	No	41.52	34.75
78	Ulcer	Trunk	No	No	16.99	10.11
79	Ulcer	Face-neck	No	No	24.83	13.59
80	Ulcer	Arms	No	No	9.89	6.89
80	Ulcer	Arms	No	No	4.71	4.38
80	Ulcer	Arms	No	No	4.3	6.24
80	Ulcer	Arms	No	No	8.02	7.28
80	Ulcer	Arms	No	No	14.08	15.44
81	Ulcer	Arms	No	No	8.3	5.4
81	Ulcer	Arms	No	No	7.1	3.1
81	Other	Trunk	No	No	3.7
82	Ulcer	Arms	No	No	20.5	18.24
82	Ulcer	Arms	No	No	21.56	20.57
83	Ulcer	Face-neck	No	No	41.7	29
84	Ulcer	Face-neck	No	No	8.17	8.7
85	Ulcer	Face-neck	No	No	29.7	29.8
85	Ulcer	Arms	No	No	29	11.8
86	Ulcer	Legs	No	No	32.7	51.48
86	Ulcer	Legs	No	No	19.93	21.3
86	Ulcer	Legs	No	No	23.98	32.05
87	Ulcer	Arms	No	No	12.45	12.21
87	Ulcer	Trunk	No	No	14.08	10.14
88	Ulcer	Arms	No	No	8.8	5.8
88	Ulcer	Arms	No	No	7.2	6.3
88	Ulcer	Arms	No	No	6.1	5.3
88	Ulcer	Arms	No	No	17.6	15.5
88	Ulcer	Arms	No	No	28.3	26.8
88	Plaque	Arms	No	No	5.4
89	Ulcer	Face-neck	No	No	31.62	23.99
90	Ulcer	Arms	Yes	No		7.2
90	Plaque	Arms	No	No	4.7
90	Ulcer	Arms	No	No	14.4	13.8
91	Ulcer	Face-neck	No	No	10.1	7.3
92	Ulcer	Arms	No	No	14.2	11.6
93	Ulcer	Arms	No	No	24.1	17.5
93	Ulcer	Arms	No	No	27.7	21.6
94	Ulcer	Legs	No	No	14.8	11.5
94	Ulcer	Legs	No	No	21.1	17.4
94	Ulcer	Legs	No	No	22.1	15.3
95	Ulcer	Legs	No	No	24.7	19.8
96	Ulcer	Legs	No	No	21.9	15
97	Ulcer	Face-neck	No	No	14.7	7
97	Ulcer	Trunk	No	No	16.6	11.5
97	Ulcer	Trunk	No	No	15.4	19
97	Ulcer	Arms	No	No	25.3	23.3
97	Ulcer	Arms	No	No	17.5	18.8
97	Ulcer	Arms	No	No	26.5	21.1
98	Ulcer	Legs	No	No	43.7	36.9
98	Ulcer	Legs	No	No	44.4	40.4
98	Ulcer	Legs	No	No	33.4	27
98	Ulcer	Legs	No	No	43.1	37
98	Ulcer	Legs	No	No	32	30.7
99	Ulcer	Legs	No	No	12.2	9.3
99	Ulcer	Legs	No	No	28.9	25.6
99	Ulcer	Legs	No	No	13.5	10
99	Ulcer	Legs	Yes	No	13.3	7.9
100	Ulcer	Trunk	Yes	No	29.2	24.2
101	Ulcer	Arms	Yes	No	11.6	10
102	Ulcer	Face-neck	Yes	No	9.7	7.3
102	Ulcer	Arms	No	No	18.2	16
102	Ulcer	Arms	No	No	13.7	17.5
103	Ulcer	Arms	Yes	No	41.5	39.5
104	Ulcer	Arms	No	No	17.9	15.9
105	Ulcer	Legs	No	No	25.1	22.1
105	Ulcer	Legs	No	No	10.2	7.6
106	Ulcer	Arms	No	No	22.2	19.6
107	Ulcer	Arms	No	No	20	16.9
108	Ulcer	Arms	Yes	Yes	41.2	33.8
109	Ulcer	Arms	No	No	29	24.2
110	Ulcer	Legs	No	No	31
111	Ulcer	Trunk	No	No	9	3
111	Ulcer	Legs	No	No		11
112	Ulcer	Face-neck	Yes	No	23	8
113	Ulcer	Legs	No	No	33	30
114	Ulcer	Legs	No	No		60
115	Ulcer	Legs	No	No	26	20
116	Ulcer	Face-neck	No	No	9	6.2
116	Ulcer	Legs	No	No	20	15
117	Ulcer	Legs	No	No	40.4	21.4
118	Ulcer	Legs	No	No	30	28
